# Supplementary material for: Body-Worn Camera Activations: Demographic, Attitudinal, and Job Function Predictors
Source: Preprints.org preprint supplement (doi:10.20944/preprints201901.0061.v1), 2019-01-08
Supplement: Supplementary file 1 [file supplementary]

**Table 1.** Descriptive Statistics

| Variable                            | n   | Mean   | Std. Dev. | Min | Max   |
|-------------------------------------|-----|--------|-----------|-----|-------|
| <b>Dependent Variable</b>           |     |        |           |     |       |
| <i>ln</i> (BWC Activations)         | 147 | 3.41   | 1.51      | 0   | 5.29  |
| <b>Demographic Controls</b>         |     |        |           |     |       |
| Female                              | 117 | 0.060  | 0.238     | 0   | 1     |
| White                               | 147 | 0.714  | 0.453     | 0   | 1     |
| Age                                 | 118 | 39.068 | 7.855     | 18  | 68    |
| Education                           | 119 | 2.176  | 1.079     | 1   | 4     |
| Years LEO Experience                | 147 | 13.068 | 7.320     | 0   | 33    |
| How Long Worn BWC                   | 147 | 4.204  | 1.098     | 1   | 5     |
| Rank                                | 146 |        |           |     |       |
| Officer                             | 115 |        |           |     |       |
| Sergeant                            | 25  |        |           |     |       |
| Lieutenant                          | 6   |        |           |     |       |
| <b>Job Function Measures</b>        |     |        |           |     |       |
| Use-of-Force Count                  | 147 | 0.313  | 0.628     | 0   | 3     |
| Total Primary Calls                 | 147 | 40.401 | 38.506    | 0   | 205   |
| Arrests                             | 147 | 1.544  | 2.581     | 0   | 17    |
| Front-line Officer                  | 147 | 0.844  | 0.365     | 0   | 1     |
| <b>BWC Attitude Measures</b>        |     |        |           |     |       |
| BWCs Modify Professional Discretion | 144 | 3.417  | 1.637     | 1   | 7     |
| BWCs are Positive                   | 147 | 4.577  | 1.200     | 1   | 7     |
| Perceived Organizational Support    | 123 | 3.443  | 1.536     | 1   | 6.714 |
| BWC Helpful in Complaints           | 143 | 6.140  | 1.004     | 1   | 7     |
| Public Does not Understand Policing | 143 | 5.923  | 1.095     | 1   | 7     |
| BWC Leads to Using Less Force       | 143 | 3.566  | 1.879     | 1   | 7     |

**Table 2.** Nested Model Results of Log-Linear Regressions on BWC Activations

|                                |                                    | Demographic         | Job Function           | Attitude               | Supported Model        |
|--------------------------------|------------------------------------|---------------------|------------------------|------------------------|------------------------|
| Demographic                    | Years LEO                          | -0.0346<br>(0.0193) | -0.0207<br>(0.0156)    | -0.0166<br>(0.0159)    | -0.0220<br>(0.0152)    |
|                                | Female                             | -0.219<br>(0.532)   | -0.0994<br>(0.418)     | -0.0487<br>(0.435)     | -0.110<br>(0.409)      |
|                                | Officer                            | (.)                 | (.)                    | (.)                    | (.)                    |
|                                | Sergeant                           | -0.488<br>(0.354)   | 0.220<br>(0.299)       | 0.154<br>(0.304)       | 0.227<br>(0.293)       |
|                                | Lieutenant                         | -1.954**<br>(0.651) | -0.735<br>(0.526)      | -0.928<br>(0.532)      | -0.782<br>(0.515)      |
|                                | How long worn BWC                  | 0.00646<br>(0.128)  | 0.0886<br>(0.101)      | 0.112<br>(0.102)       | 0.0947<br>(0.0992)     |
| Job Function                   | Use-of-Force Count                 | --                  | 0.298<br>(0.155)       | 0.414*<br>(0.163)      | 0.394*<br>(0.157)      |
|                                | Total Calls                        | --                  | 0.0150***<br>(0.00351) | 0.0146***<br>(0.00350) | 0.0150***<br>(0.00344) |
|                                | Total Arrests                      | --                  | 0.0993*<br>(0.0443)    | 0.0866<br>(0.0449)     | 0.0853<br>(0.0437)     |
|                                | Front-Line Assignment              | --                  | 1.231***<br>(0.289)    | 1.172***<br>(0.288)    | 1.216***<br>(0.283)    |
| Officer Attitudes Towards BWCs | BWCs Modify Professional Practices | --                  | --                     | -0.145*<br>(0.0641)    | -0.145*<br>(0.0607)    |
|                                | BWC are Positive                   | --                  | --                     | 0.0388<br>(0.107)      | --                     |
|                                | Perceived Organizational Support   | --                  | --                     | 0.0928<br>(0.0758)     | --                     |
|                                | BWCs Help in Complaints            | --                  | --                     | -0.0774<br>(0.118)     | --                     |
|                                | Public Not Understand Police Work  | --                  | --                     | 0.0697<br>(0.0947)     | --                     |
|                                | BWCs Cause Less Force              | --                  | --                     | 0.0481<br>(0.0553)     | --                     |
|                                | Constant                           | 4.115***<br>(0.575) | 1.499**<br>(0.553)     | 1.298<br>(1.080)       | 1.996***<br>(0.579)    |
| Observations                   | 117                                | 117                 | 117                    | 117                    |                        |
| Adjusted R <sup>2</sup>        | 0.121                              | 0.475               | 0.489                  | 0.497                  |                        |
| AIC                            | 407.199                            | 350.598             | 352.595                | 346.439                |                        |
| BIC                            | 423.772                            | 378.220             | 396.790                | 376.823                |                        |
| LR chi <sup>2</sup> diff       | --                                 | 0.000***            | 0.599                  | 0.013*                 |                        |

# Appendix - Figures

## Figure A1: Correlation Heat Map

CITE

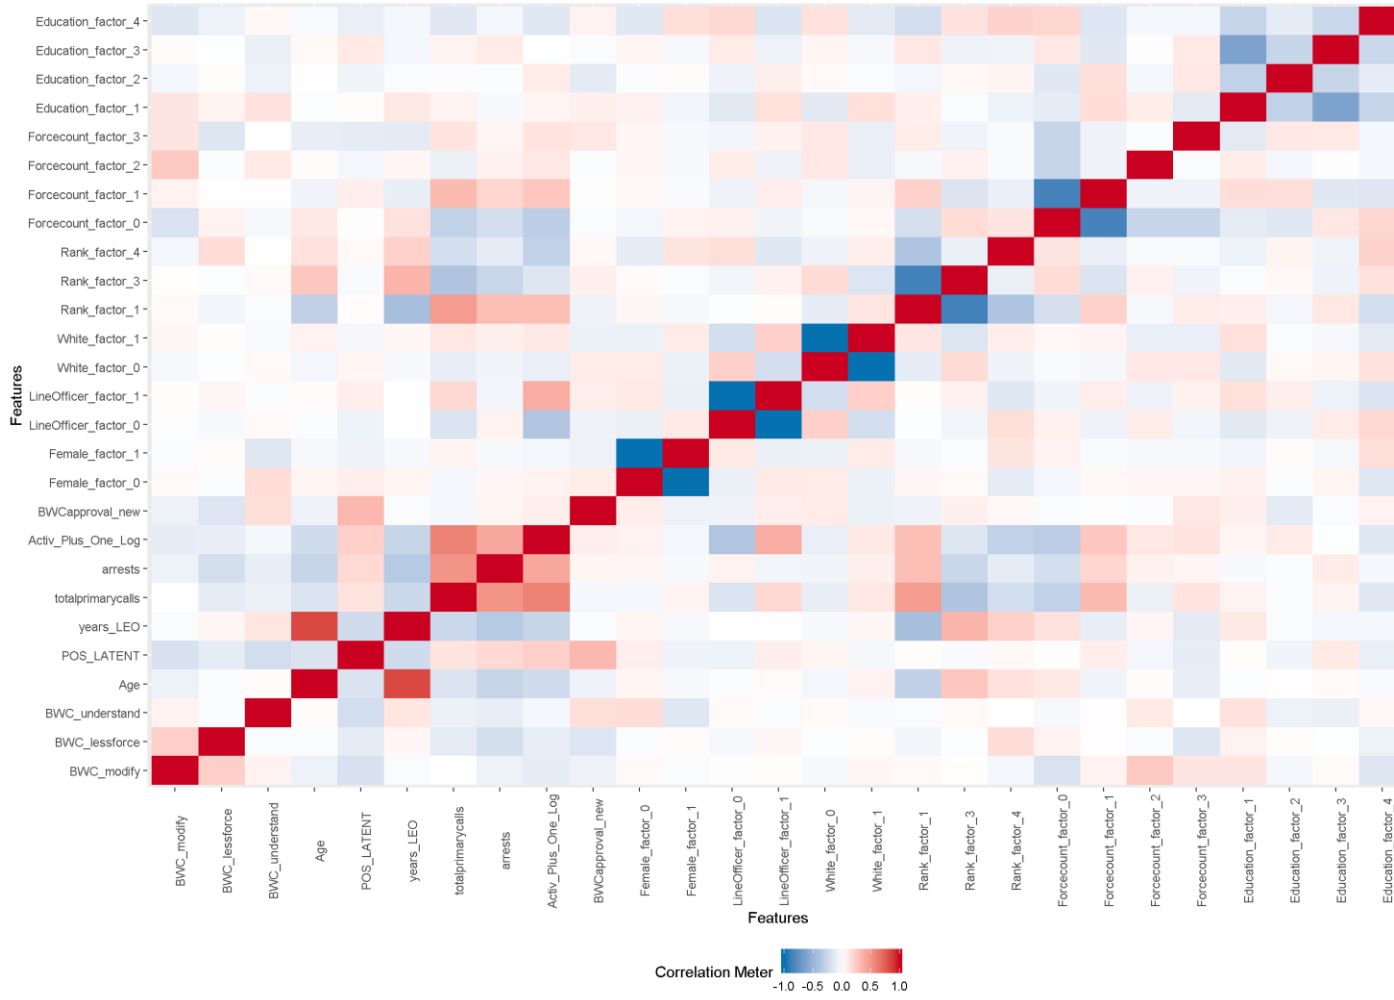

1

**Figure A2: Data Missingness**

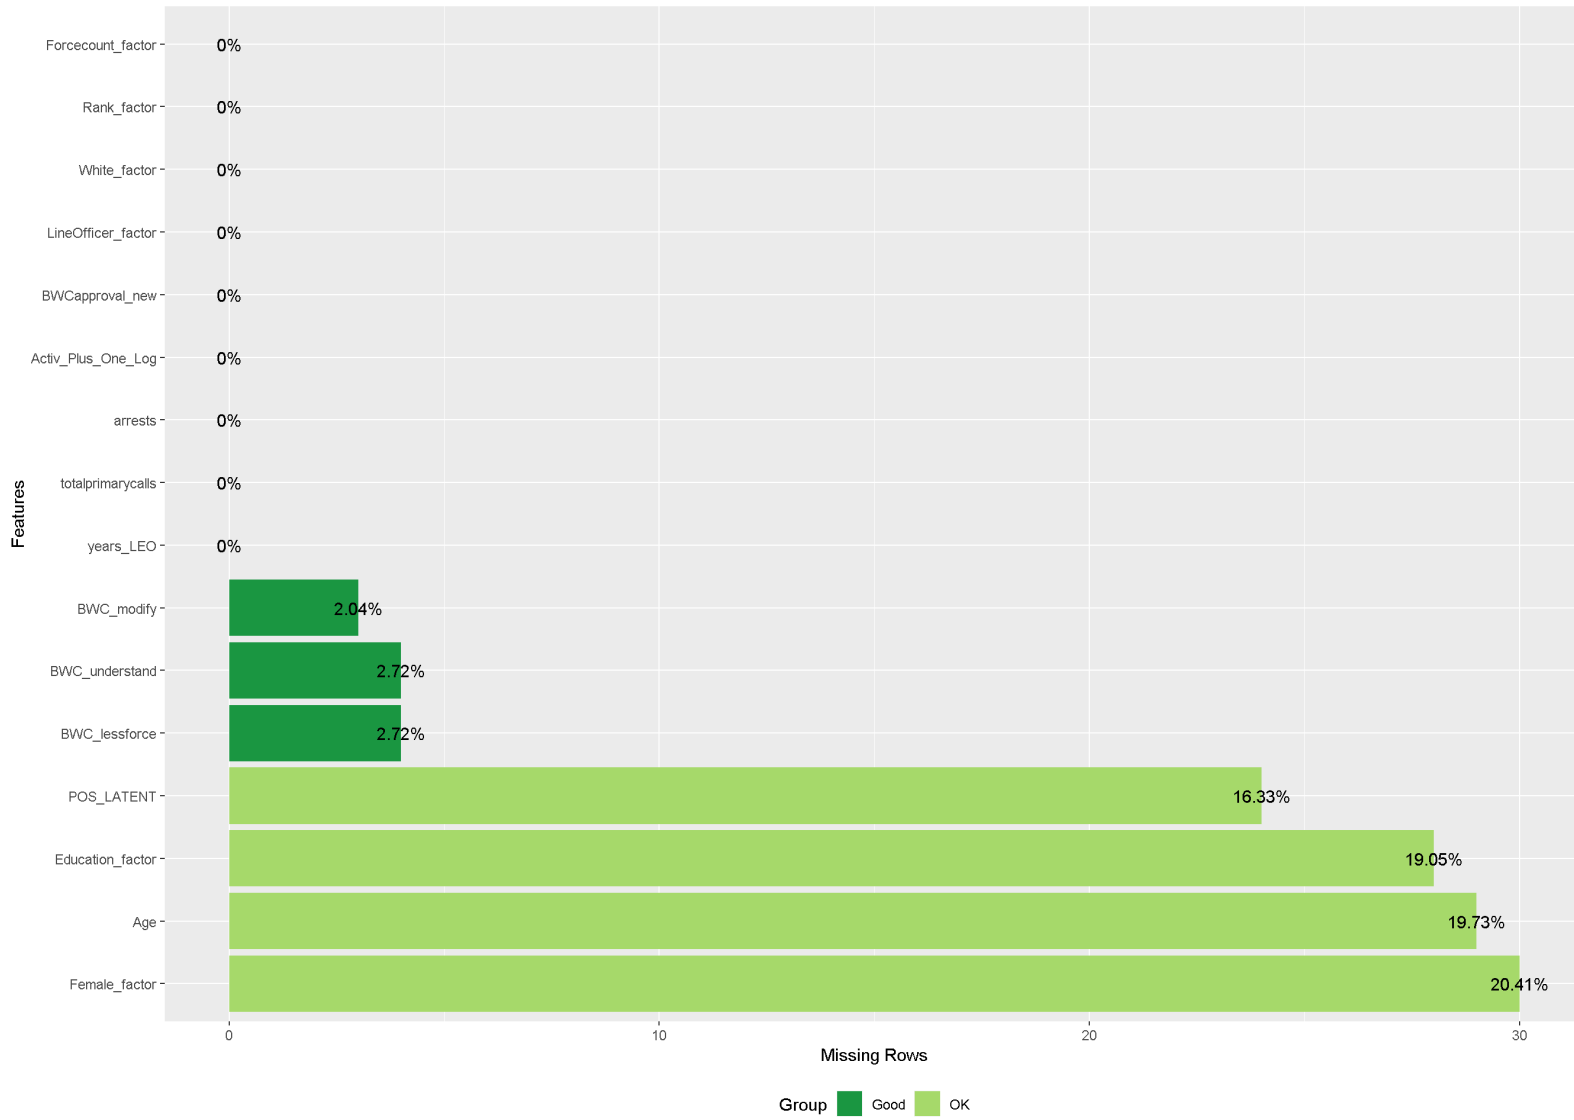

**Figure A3: Continuous Variable Univariate Distribution**

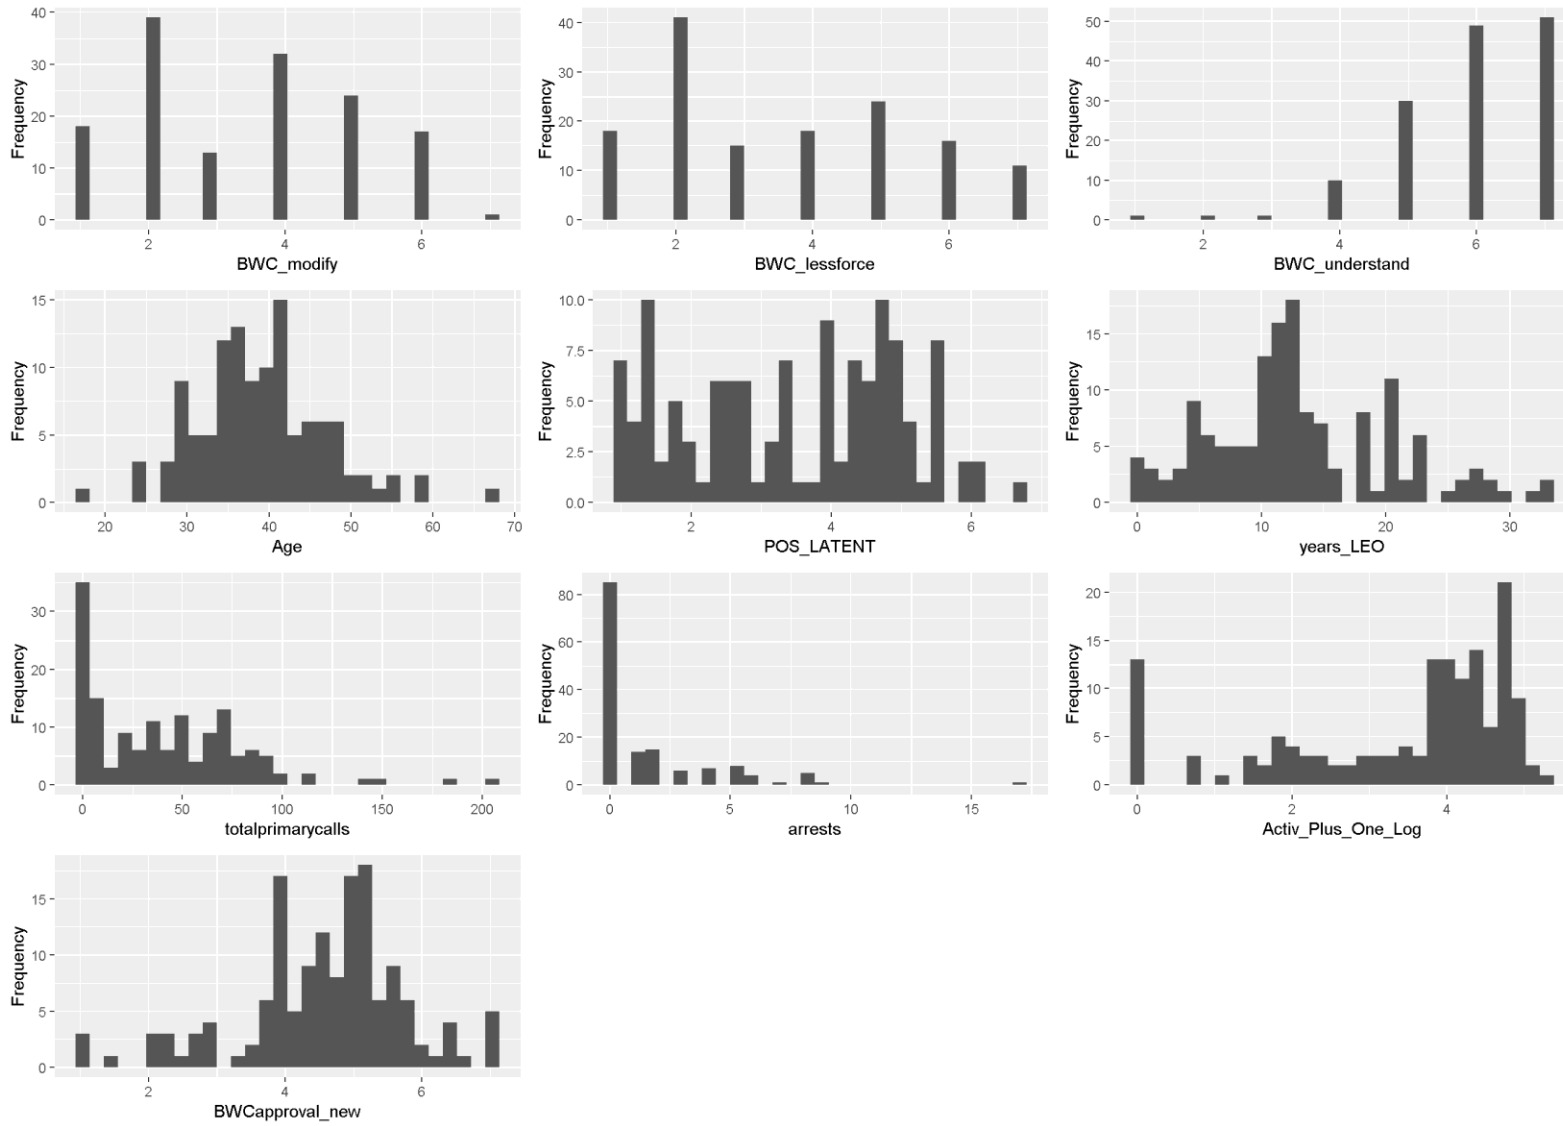

Figure A4: Discrete Variable Univariate Distribution

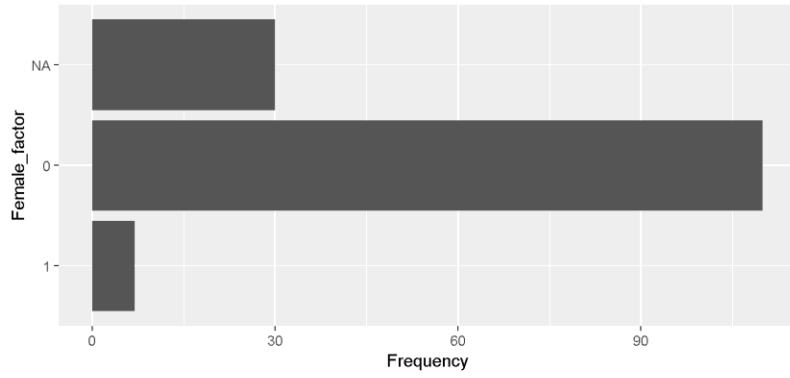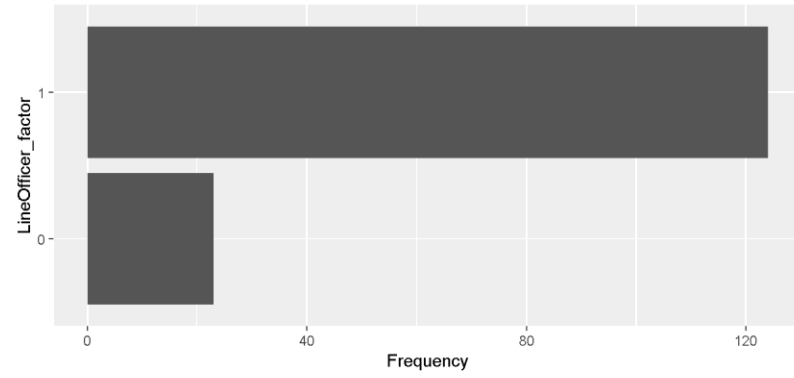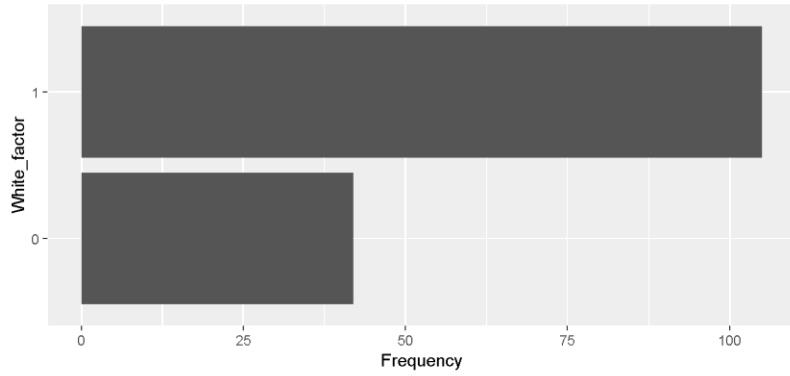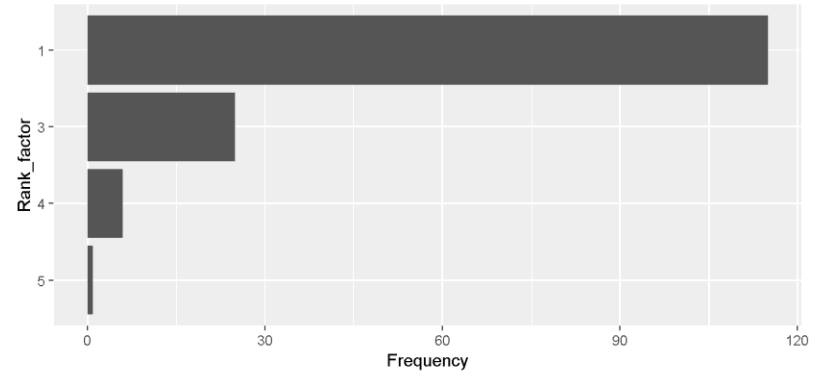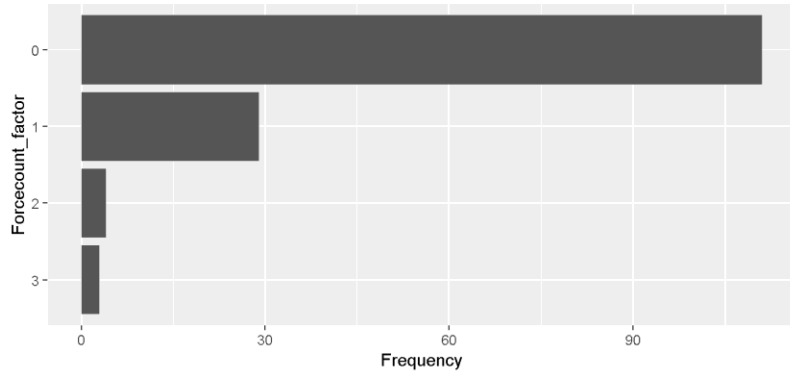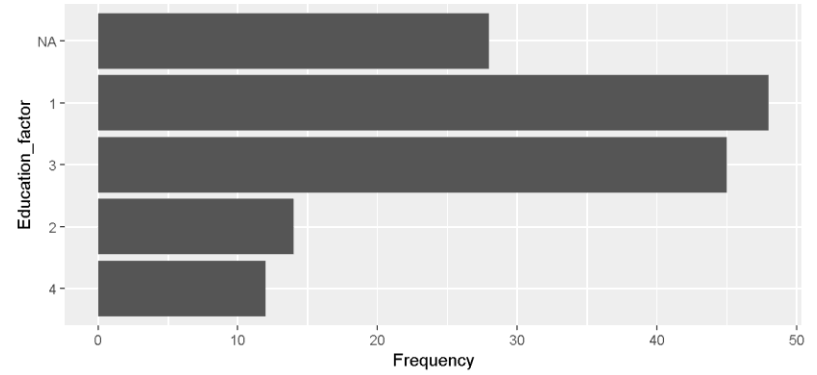

### Individual Items Comprising Summed Constructs

A. *Perceived Organizational Support* ( $\alpha = 0.959$ )

“The law enforcement agency I work for...”

1. Values my contribution to its success.
2. Considers my best interests when it makes decisions that affect me.
3. Values my opinions.
4. Takes pride in my work accomplishments.
5. Cares about my general satisfaction at work.
6. Provides help and support when I have a problem.
7. Strongly considers my goals and values when making decisions that affect me.

B. *BWCs are Positive* ( $\alpha = 0.883$ )

1. My agency should adopt BWCs for all front-line police officers.
2. Wearing a BWC would change my behavior for the better.
3. Wearing a BWC would change other officers' behavior for the better.
4. BWCs would improve my evidence collection.
5. BWCs would improve my recollection of events.
6. Reviewing BWC video after an incident would help me become a better police officer.
7. Reviewing BWC video after an incident would help me identify ways to improve interactions with citizens.
8. Reviewing BWC video after an incident would help me identify issues I may need improvement on.
